# Supplementary material for: Nanocomposite Sprayed Films with Photo-Thermal Properties for Remote Bacteria Eradication
Source: Nanomaterials (Basel). 2020 Apr 20;10(4):786. doi: 10.3390/nano10040786 (PMC7221876; doi:10.3390/nano10040786)
Supplement: Supplementary file 1 [file nanomaterials-10-00786-s001.pdf]

# Nanocomposite Sprayed Films with Photo-Thermal Properties for Remote Bacteria Eradication

Mykola Borzenkov <sup>1,\*</sup>, Giuseppe Chirico <sup>2,3</sup>, Piersandro Pallavicini <sup>4</sup>, Paola Sperandeo <sup>5</sup>, Alessandra Polissi <sup>5</sup>, Giacomo Dacarro <sup>4</sup>, Lavinia Doveri <sup>4</sup>, Maddalena Collini <sup>2,3</sup>, Laura Sironi <sup>2</sup>, Margaux Bouzin <sup>2</sup> and Laura D'Alfonso <sup>2,\*</sup>

<sup>1</sup> Department of Medicine and Surgery, Nanomedicine Center, University of Milano-Bicocca, Via Raoul Follereau 3, 20854, Veduggio al Lambro (MB), Italy;

<sup>2</sup> Department of Physics, University of Milano-Bicocca, Piazza della Scienza 3, 20126 Milan, Italy; [giberto.chirico@mib.infn.it](mailto:giberto.chirico@mib.infn.it) (G.C.); [maddalena.collini@mib.infn.it](mailto:maddalena.collini@mib.infn.it) (M.C.); [laura.sironi@unimib.it](mailto:laura.sironi@unimib.it) (L.S.); [margaux.bouzin@unimib.it](mailto:margaux.bouzin@unimib.it) (M.B.)

<sup>3</sup> CNR Institute for Applied Science and Intelligent Systems, Via Campi Flegrei 34, 80078, Pozzuoli, Italy;

<sup>4</sup> Department of Chemistry, University of Pavia, via Taramelli 12, 27100 Pavia, Italy; [psp@unipv.it](mailto:psp@unipv.it) (P.P.); [giacomo.dacarro@unipv.it](mailto:giacomo.dacarro@unipv.it) (G.D.); [laviniaarita.doveri01@universitadipavia.it](mailto:laviniaarita.doveri01@universitadipavia.it) (L.D.)

<sup>5</sup> Department of Pharmacological and Biomolecular Sciences, University of Milano, via Balzaretti 9, 20133 Milan, Italy; [paola.sperandeo@unimi.it](mailto:paola.sperandeo@unimi.it) (P.S.); [alessandra.polissi@unimi.it](mailto:alessandra.polissi@unimi.it) (A.P.)

\* Correspondence: [mykola.borzenkov@unimib.it](mailto:mykola.borzenkov@unimib.it) (M.B.); [laura.dalfonso@unimib.it](mailto:laura.dalfonso@unimib.it) (L.D.)

Received: 24 March 2020; Accepted: 16 April 2020; Published: 20 April 2020

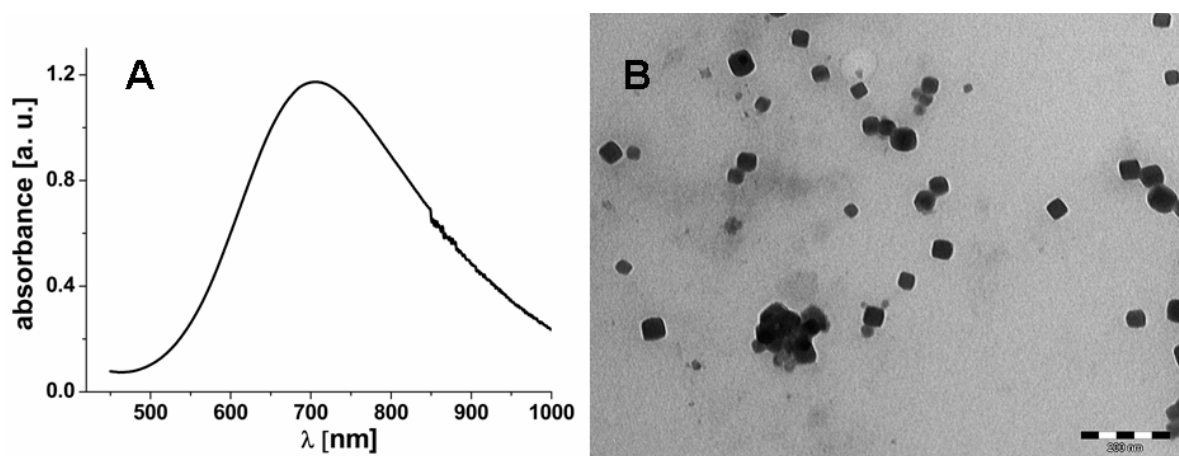

**Figure S1.** A: absorbance spectrum of PB stock aqueous solution (diluted 36 times); B: representative TEM image of PB nanoparticles.

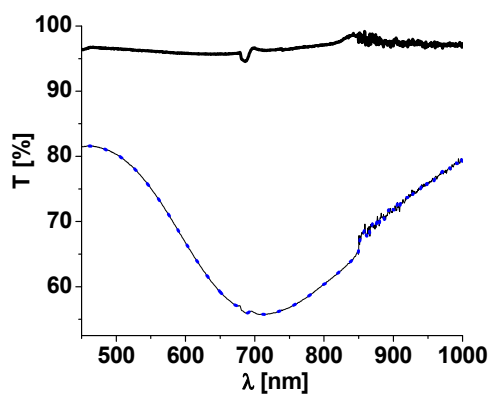

**Figure S2A.** The transmittance spectra of sprayed films (10 layers) with (blue line) and without (black line) Prussian Blue nanoparticles

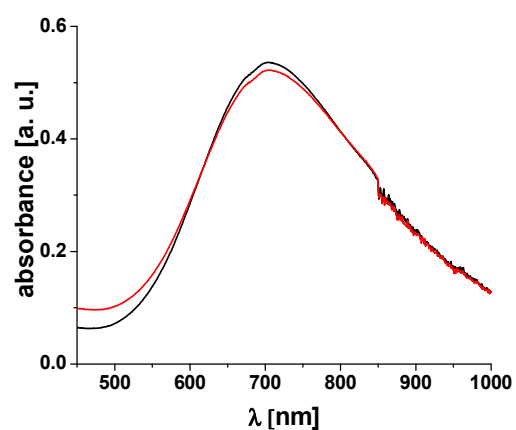

**Figure S2B.** Absorbance spectra of PB spray formulation immediately after preparation (black line) and after 4 weeks of storage (red line)

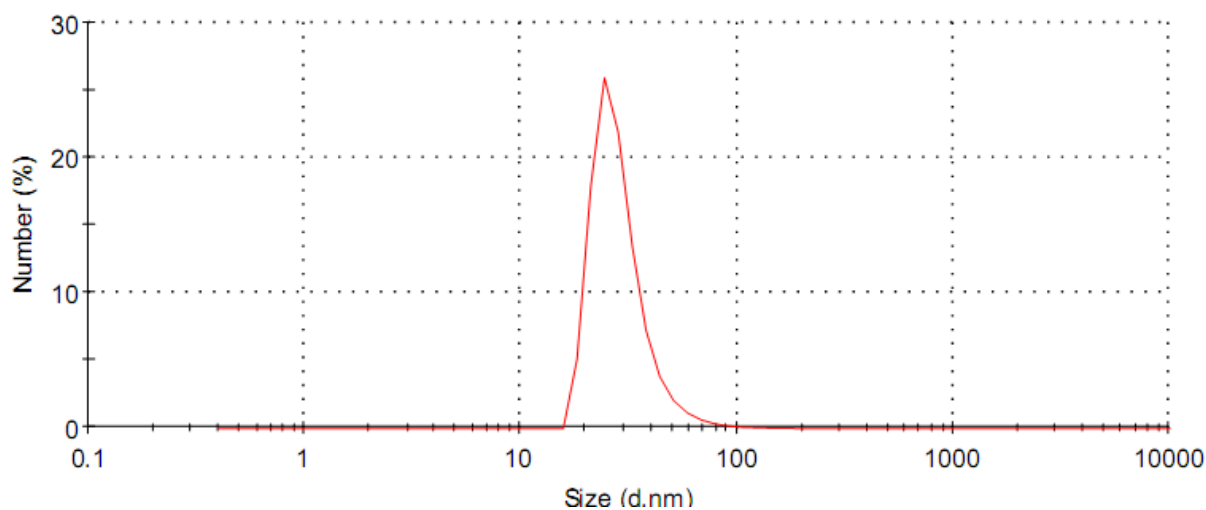

**Figure S3.** Size distribution of PB nanoparticles in spray solution after 4 weeks of storage

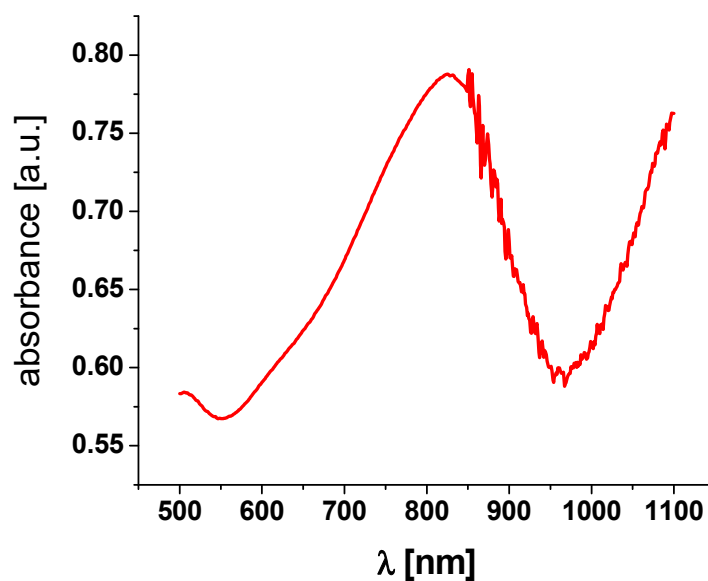

**Figure S4.** Absorbance spectrum of GNS stock aqueous solution (diluted 7 times)

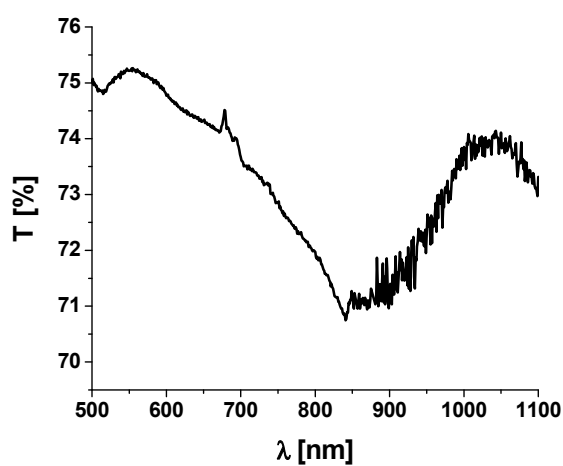

**Figure S5A.** The transmittance spectra of sprayed (10 layers) GNS-PVA film

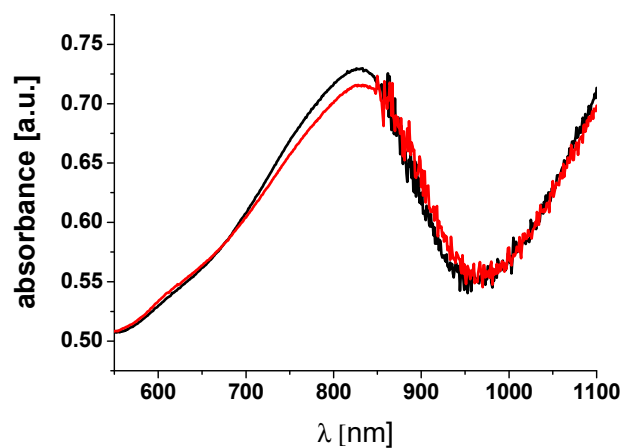

**Figure S5B.** Absorbance spectra of GNS spray formulation immediately after preparation (black line) and after 4 weeks of storage (red line)

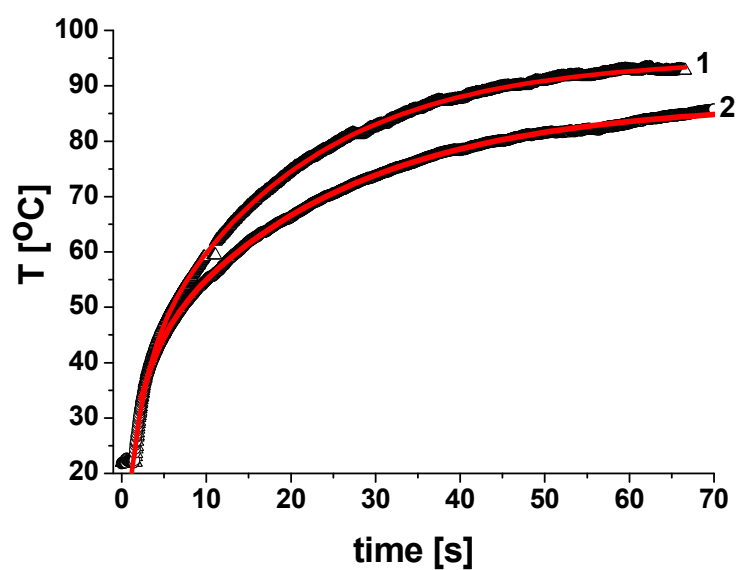

**Figure S6.** The temperature increase of sprayed film under irradiation with 700 nm and laser intensity of  $0.63 \text{ W/cm}^2$  (1) and  $0.51 \text{ W/cm}^2$  (2). The data are best fit to double exponential growth (solid red lines).

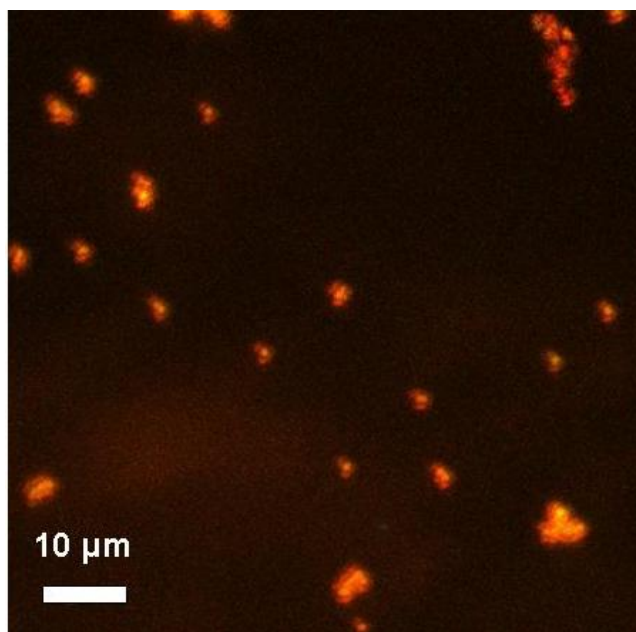

**Figure S7.** Representative confocal image of *S. aureus* bacteria after 30 min of NIR irradiation at  $0.63 \text{ W/cm}^2$ . Field of view:  $64.2 \times 64.2 \mu\text{m}^2$ .
